# Supplementary material for: Optically trapped SiO2@Au particle-dye hybrid-based SERS detection of Hg2+ ions
Source: Royal Society of Chemistry journal article supplement (doi:10.1039/d2an01326f), 2022-12-19
Supplement: d2an01326f1.pdf [file d2an01326f1.pdf]

**Supplementary information:**

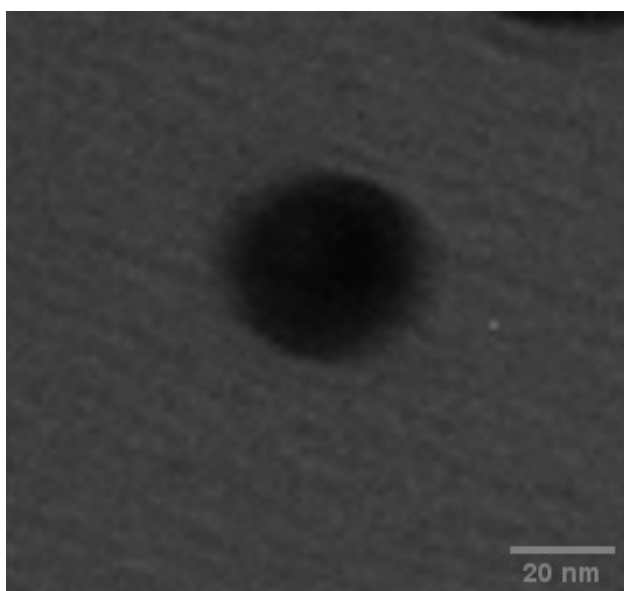

**Figure S1:** TEM image of gold nanoparticle

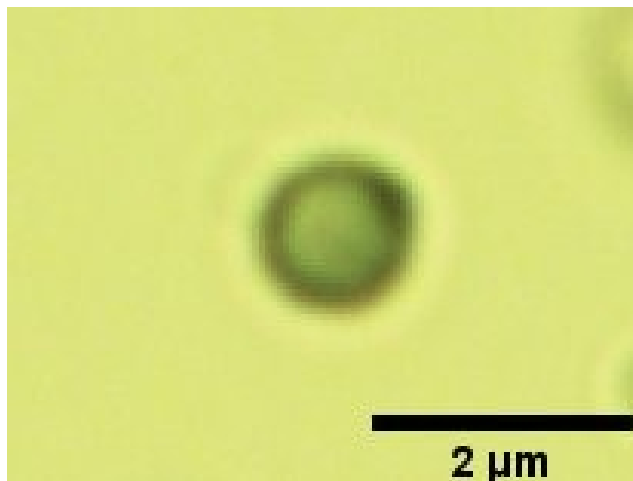

**Figure S2:** Microscope image of gold nanoparticle attached SiO<sub>2</sub>

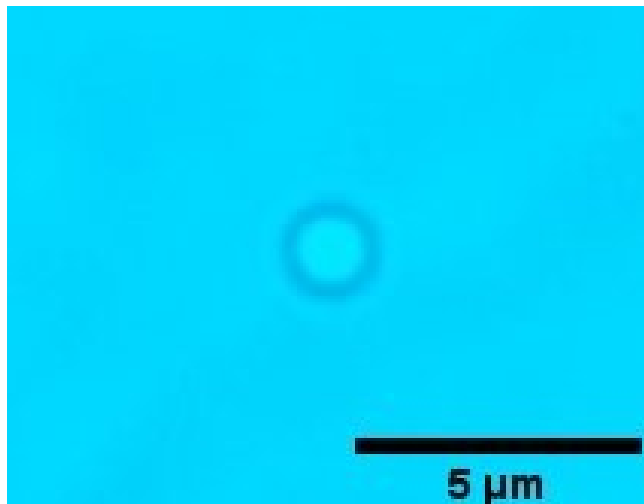

**Figure S3:** Microscope image of optically trapped SiO<sub>2</sub> particle

**Table 1:** The Raman peak assignment of Crystal violet

| CV<br>Raman Shift(cm <sup>-1</sup> ) | Assignment                                            |
|--------------------------------------|-------------------------------------------------------|
| 411                                  | Out-of-plane bending mode of C-C <sub>center</sub> -C |
| 431                                  | Bending mode of C-N-C                                 |
| 519                                  | Bending mode of C-N-C                                 |
| 564                                  | Out-of-plane aromatic C-C deformation                 |
| 725                                  | C-N-C symmetric stretching vibration                  |
| 805                                  | Ring C-H bending                                      |
| 907                                  | C-H out-of-plane bending modes                        |
| 1169                                 | C-H in-plane bending mode                             |
| 1368                                 | Stretching vibration of nitrogen and phenyl ring      |

|      |                                                   |
|------|---------------------------------------------------|
| 1525 | Asymmetric stretching of phenyl ring and nitrogen |
| 1580 | In-plane aromatic C-C                             |
| 1610 | In-plane aromatic C-C                             |

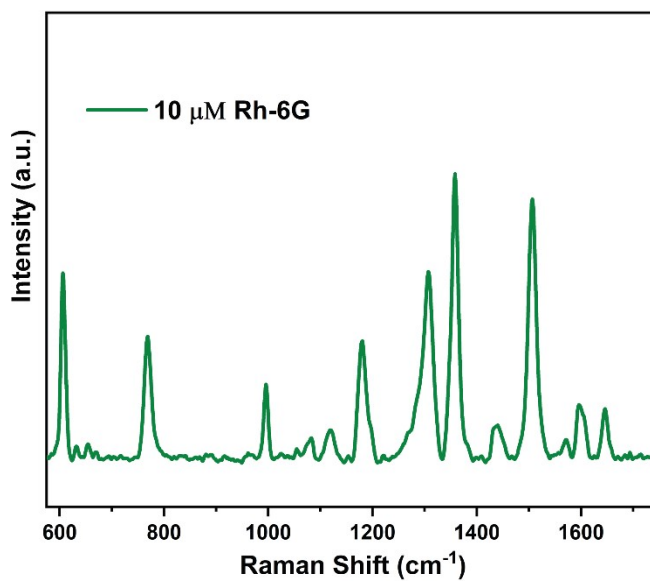

**Figure S4:** Raman spectra of Rh-6G solution (concentration 10 μM) on which the Ag nanoparticle coated silica particle is optically trapped.
